# Supplementary material for: Unidades cristalizadas e provérbios: uma "Carta" de 1736 de Cavaleiro de Oliveira.Apontamentos de paremiologia portuguesa
Source: MDPI journal article supplement (doi:10.3390/bioengineering9070327), 1998-01-01
Supplement: s1 [file s1]

## Supplementary Materials

**Supplemental Table S1.** Primers for qPCR.

| Gene          | Forward primer (5' to 3')    | Reverse primer (5' to 3')   | TaqMan probe (5' to 3')                            |
|---------------|------------------------------|-----------------------------|----------------------------------------------------|
| <b>Mouse</b>  |                              |                             |                                                    |
| <i>36b4</i>   | TTATAACCCTGAAGTG<br>CTCGAC   | CGCTTGTACCCATT-<br>GATGATG  | /FAM/AG-<br>GCCCTGC/ZEN/ACTCTCGCTT/IABkFQ/         |
| <i>Col1a1</i> | CGCAAAGAGTC-<br>TACATGTCTAGG | CATTGTG-<br>TATGCAGCTGACTTC | /FAM/CCGGAGGTC/ZEN/CACAAA-<br>GCTGAACA/IABkFQ/     |
| <i>Col4a1</i> | TCTGGCTGTG-<br>GAAAATGTGA    | AATCCAATGACAC-<br>CTTGCAAC  | /FAM/TCTTTCTCC/ZEN/CTTTT-<br>GTCCCTTCACGC/IABkFQ/  |
| <i>Col6a1</i> | CCAGATGAGTGTGA-<br>GATCCTG   | AAGTTCTG-<br>TAGGCCAATGCTC  | /FAM/ACCCATTGA/ZEN/CATCCTCTTCGT<br>GCTG/IABkFQ/    |
| <i>Fn1</i>    | GAGCTATCCATTTCAC-<br>CTTCAGA | TTGTTTCGTAGACAC-<br>TGGAGA  | /FAM/CAGGAGATT/ZEN/TGTTAGGAC-<br>CACGGCA/IABkFQ/   |
| <i>Pparg</i>  | CTGCTCCACAC-<br>TATGAAGACAT  | TGCAGGTTCTACTTT-<br>GATCGC  | /FAM/AGCTGACCC/ZEN/AATGGTT-<br>GCTGATTACA/IABkFQ/  |
| <i>Fabp4</i>  | AAATCACCGCAGAC-<br>GACAG     | CCTTTCATAACACATT<br>CCACCAC | /FAM/TGAAGAGCA/ZEN/TCATAACCCTA-<br>GATGGCG/IABkFQ/ |

**Supplemental Table S2.** the use of macro for Image J to define 3D spheroid size.

| Image J macro                                                                                                                                                                                                                                                                                                                                                                                                                                                                                     |
|---------------------------------------------------------------------------------------------------------------------------------------------------------------------------------------------------------------------------------------------------------------------------------------------------------------------------------------------------------------------------------------------------------------------------------------------------------------------------------------------------|
| <pre> title = getTitle(); run("Make Composite"); run("Split Channels"); close("C3-" + title); selectWindow("C1-" + title); run("Duplicate..."); setAutoThreshold("Huang dark"); //run("Threshold..."); setOption("BlackBackground", true); run("Convert to Mask"); run("Set Measurements...",     "area mean standard integrated limit display redirect=" + "C2-" + title + " decimal=2"); run("Analyze Particles...", "size=50000-Infinity pixel show=Outlines display exclude include"); </pre> |

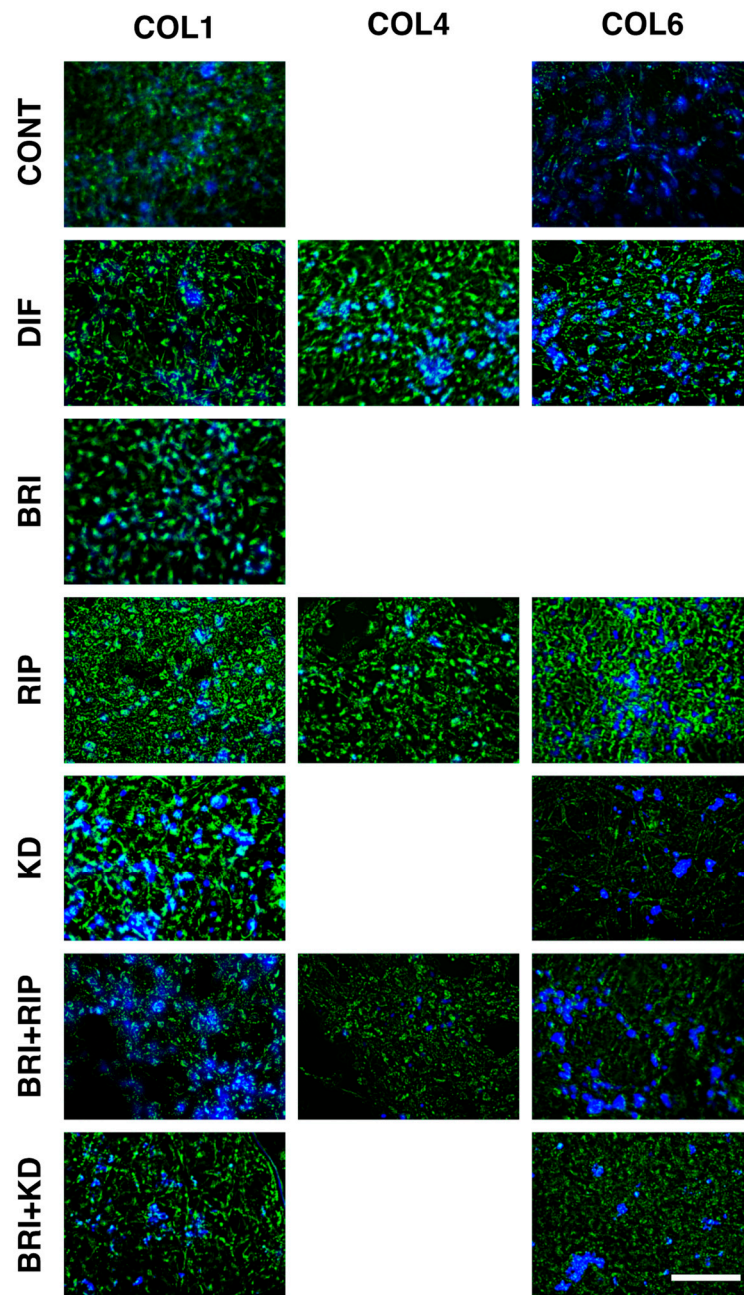

**Supplemental Figure S1.** Effects of ROCK-i and/or BRI on the immunolabeling of ECM proteins of 2D cultured 3T3-L1 cells.

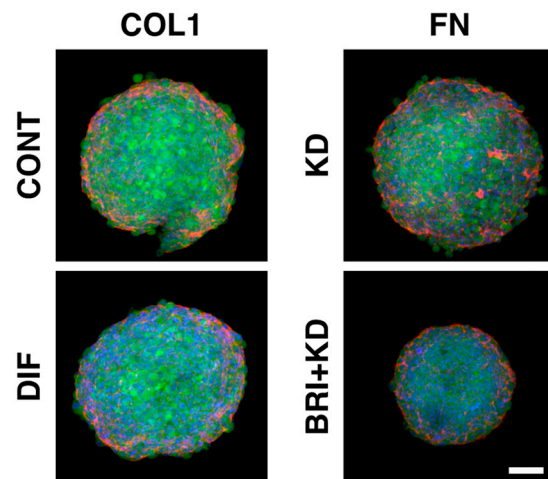

**Supplemental Figure S2.** Effects of ROCK-i and/or BRI on the immunolabeling of ECM proteins of 3D cultured 3T3-L1 cells.
